# Supplementary material for: Sequential Ras/MAPK and PI3K/AKT/mTOR pathways recruitment drives basal extrusion in the prostate-like gland of Drosophila
Source: PubMed Central journal article supplement (PMC7210301; doi:10.1038/s41467-020-16123-w), 2020-05-08
Supplement: 41467_2020_16123_MOESM1_ESM.pdf [file 41467_2020_16123_MOESM1_ESM.pdf]

## Reporting Summary

Nature Research wishes to improve the reproducibility of the work that we publish. This form provides structure for consistency and transparency in reporting. For further information on Nature Research policies, see [Authors & Referees](#) and the [Editorial Policy Checklist](#).

### Statistics

For all statistical analyses, confirm that the following items are present in the figure legend, table legend, main text, or Methods section.

n/a Confirmed

- |                                     |                                     |                                                                                                                                                                                                                                                            |
|-------------------------------------|-------------------------------------|------------------------------------------------------------------------------------------------------------------------------------------------------------------------------------------------------------------------------------------------------------|
| <input type="checkbox"/>            | <input checked="" type="checkbox"/> | The exact sample size ( $n$ ) for each experimental group/condition, given as a discrete number and unit of measurement                                                                                                                                    |
| <input type="checkbox"/>            | <input checked="" type="checkbox"/> | A statement on whether measurements were taken from distinct samples or whether the same sample was measured repeatedly                                                                                                                                    |
| <input type="checkbox"/>            | <input checked="" type="checkbox"/> | The statistical test(s) used AND whether they are one- or two-sided<br><i>Only common tests should be described solely by name; describe more complex techniques in the Methods section.</i>                                                               |
| <input checked="" type="checkbox"/> | <input type="checkbox"/>            | A description of all covariates tested                                                                                                                                                                                                                     |
| <input checked="" type="checkbox"/> | <input type="checkbox"/>            | A description of any assumptions or corrections, such as tests of normality and adjustment for multiple comparisons                                                                                                                                        |
| <input checked="" type="checkbox"/> | <input type="checkbox"/>            | A full description of the statistical parameters including central tendency (e.g. means) or other basic estimates (e.g. regression coefficient) AND variation (e.g. standard deviation) or associated estimates of uncertainty (e.g. confidence intervals) |
| <input type="checkbox"/>            | <input checked="" type="checkbox"/> | For null hypothesis testing, the test statistic (e.g. $F$ , $t$ , $r$ ) with confidence intervals, effect sizes, degrees of freedom and $P$ value noted<br><i>Give <math>P</math> values as exact values whenever suitable.</i>                            |
| <input checked="" type="checkbox"/> | <input type="checkbox"/>            | For Bayesian analysis, information on the choice of priors and Markov chain Monte Carlo settings                                                                                                                                                           |
| <input checked="" type="checkbox"/> | <input type="checkbox"/>            | For hierarchical and complex designs, identification of the appropriate level for tests and full reporting of outcomes                                                                                                                                     |
| <input checked="" type="checkbox"/> | <input type="checkbox"/>            | Estimates of effect sizes (e.g. Cohen's $d$ , Pearson's $r$ ), indicating how they were calculated                                                                                                                                                         |

*Our web collection on [statistics for biologists](#) contains articles on many of the points above.*

### Software and code

Policy information about [availability of computer code](#)

|                 |                                                                                                                                                                                                                                                                                                                             |
|-----------------|-----------------------------------------------------------------------------------------------------------------------------------------------------------------------------------------------------------------------------------------------------------------------------------------------------------------------------|
| Data collection | micrographs came from SP5 and SP8 Leica confocals using Leica application suite X.                                                                                                                                                                                                                                          |
| Data analysis   | Violin plot were made using R package "ggplot2" applying "geomviolin()" function. "geomboxplot()" function was used to add boxplot inside violin. ImageJ: version 2.0.0-rc-69/1.52p for image production, ; Imaris version 9.2 for cell and nucleus sizes; GraphPad Prism 5 and 6 for mRNA and migration statistical tests. |

For manuscripts utilizing custom algorithms or software that are central to the research but not yet described in published literature, software must be made available to editors/reviewers. We strongly encourage code deposition in a community repository (e.g. GitHub). See the Nature Research [guidelines for submitting code & software](#) for further information.

### Data

Policy information about [availability of data](#)

All manuscripts must include a [data availability statement](#). This statement should provide the following information, where applicable:

- Accession codes, unique identifiers, or web links for publicly available datasets
- A list of figures that have associated raw data
- A description of any restrictions on data availability

The dataset analysed during the current study is available at <http://cbio.mskcc.org/cancergenomics/prostate/data/>. Raw data concerning tumour counts, qPCR and migration tests are available as source data files. All other data are available from the corresponding author upon reasonable request.

## Field-specific reporting

Please select the one below that is the best fit for your research. If you are not sure, read the appropriate sections before making your selection.

Life sciences     Behavioural & social sciences     Ecological, evolutionary & environmental sciences

For a reference copy of the document with all sections, see [nature.com/documents/nr-reporting-summary-flat.pdf](https://nature.com/documents/nr-reporting-summary-flat.pdf)

## Life sciences study design

All studies must disclose on these points even when the disclosure is negative.

|                 |                                                                                                                                                                                                                                                                                                                                                                                                                                                                                                                                                                                                              |
|-----------------|--------------------------------------------------------------------------------------------------------------------------------------------------------------------------------------------------------------------------------------------------------------------------------------------------------------------------------------------------------------------------------------------------------------------------------------------------------------------------------------------------------------------------------------------------------------------------------------------------------------|
| Sample size     | No sample size calculation was performed. Typical sample size in the field is 5-20. As chosen animal model displays no ethical concerns, experiments were done on typically more than 50 individuals per condition over a minimum of 4 repeats (see figures for specific numbers)                                                                                                                                                                                                                                                                                                                            |
| Data exclusions | no                                                                                                                                                                                                                                                                                                                                                                                                                                                                                                                                                                                                           |
| Replication     | Each experiment has been replicated successfully two or more times.                                                                                                                                                                                                                                                                                                                                                                                                                                                                                                                                          |
| Randomization   | Mostly, organisms were assigned to groups only at the end of the experiment, depending on their genotype. In some cases, flies were raised separately from eclosion depending on their genotype, for experimental simplicity (possibility to dissect the different genotypes sequentially, and so to minimize the risk of mixed tumor counts).                                                                                                                                                                                                                                                               |
| Blinding        | For drosophila, blinding impossible for dissection procedures (invasive tumour counts) as the different genotypes induce different phenotypes (eye color for example). For this reason, multiple experimentators were assigned to each kind of experiment to test reproducibility. Same procedure was done for cell culture work, with 2 people working together on the experiments. For human data, only one person initially manipulated the data (Yoan Renaud). However, blinding was used in this case as no indication on what could be coherent results were discussed with him before data treatment. |

## Reporting for specific materials, systems and methods

We require information from authors about some types of materials, experimental systems and methods used in many studies. Here, indicate whether each material, system or method listed is relevant to your study. If you are not sure if a list item applies to your research, read the appropriate section before selecting a response.

### Materials & experimental systems

| n/a                                 | Involvement in the study                                        |
|-------------------------------------|-----------------------------------------------------------------|
| <input type="checkbox"/>            | <input checked="" type="checkbox"/> Antibodies                  |
| <input type="checkbox"/>            | <input checked="" type="checkbox"/> Eukaryotic cell lines       |
| <input checked="" type="checkbox"/> | <input type="checkbox"/> Palaeontology                          |
| <input type="checkbox"/>            | <input checked="" type="checkbox"/> Animals and other organisms |
| <input checked="" type="checkbox"/> | <input type="checkbox"/> Human research participants            |
| <input checked="" type="checkbox"/> | <input type="checkbox"/> Clinical data                          |

### Methods

| n/a                                 | Involvement in the study                        |
|-------------------------------------|-------------------------------------------------|
| <input checked="" type="checkbox"/> | <input type="checkbox"/> ChIP-seq               |
| <input checked="" type="checkbox"/> | <input type="checkbox"/> Flow cytometry         |
| <input checked="" type="checkbox"/> | <input type="checkbox"/> MRI-based neuroimaging |

## Antibodies

### Antibodies used

We used the following primary antibodies: Mouse Coracle (1:300, #C566.9 DSHB), mouse Fasciclin III (1:400, #7610 DSHB), rat E-Cadherin (1:1000, #DCAD2 DSHB), rabbit P-4E-BP1 (1:200, 2855S Cell Signaling), rabbit P-ERK (1:500, 4370S Cell Signaling), goat GFP (1:1000, #5450 Abcam), mouse GASP (1/5, 2A12 DSHB), mouse MMP1 (1/100, 14A3D2 DSHB ; 1:10 #3A6B4 #3B8D12 #5H7B11 DSHB), rat Spitz (1:100, DSHB), rabbit P-Src (1:500, #44-660G Invitrogen). secondary antibodies coupled to different fluorophores 488 (1:1000, A11055 Invitrogen), Cy5 or Cy3 (1:1000, 711-165-152, 711-175-152, 712-165-153, 712-175-153, 715-165-150, 715-165-151, 715-175-150, 715-175-151, Jackson Immunology)

### Validation

All the antibodies are commercially available, validated by the manufacturers for drosophila use and immunohistochemistry, and already published in scientific papers (examples below for primary antibodies).  
 P-4E-BP1, Fasciclin 3, Coracle and GFP antibodies along with phalloïdin conjugates were already published in Vachias et al, 2014, DOI: <https://doi.org/10.1016/j.celrep.2014.09.035>  
 P-ERK antibody : Xu et al, eLife 2017, DOI: 10.7554/eLife.22441.001  
 E-Cadherin antibody : Ito et al, 2014 : DOI: 10.1016/j.bbrc.2014.08.015  
 GASP antibody : Tiklova et al, 2013 : DOI: 10.1371/journal.pone.0067415  
 MMP1 antibody : Sauerwald et al, Elife. 2019. doi: 10.7554/eLife.48857.  
 Spitz antibody : Schweitzer et al, Genes Dev 1995, DOI:10.1101/gad.9.12.1518. For immunohistochemistry purpose, we validated antibody on clones expressing an RNAi against Spitz.  
 P-Src antibody : Bangi et al, Nat Commun 2016, doi: 10.1038/ncomms13615

## Eukaryotic cell lines

Policy information about [cell lines](#)

|                                                                      |                                                                                                                                                                                       |
|----------------------------------------------------------------------|---------------------------------------------------------------------------------------------------------------------------------------------------------------------------------------|
| Cell line source(s)                                                  | P69 cell line was obtained from Bost laboratory (C3M laboratory, Nice, France) through collaborative exchange.                                                                        |
| Authentication                                                       | Morphologic characteristics and very low growth rate specific to non tumoral cells. Source batch published previously in Ben Sarha et al, Oncogene 2008, doi: 10.1038/sj.onc.1211024. |
| Mycoplasma contamination                                             | Tested, negative.                                                                                                                                                                     |
| Commonly misidentified lines<br>(See <a href="#">ICLAC</a> register) | None. Not amongst misidentified cell lines (source : iclac.org, version 10).                                                                                                          |

## Animals and other organisms

Policy information about [studies involving animals](#); [ARRIVE guidelines](#) recommended for reporting animal research

|                         |                                                       |
|-------------------------|-------------------------------------------------------|
| Laboratory animals      | Drosophila melagonaster, W1118, males, aged 3-4 days. |
| Wild animals            | No wild animals were collected in the study           |
| Field-collected samples | No field-collected samples were used in the study     |
| Ethics oversight        | Not applicable to mentioned animal model              |

Note that full information on the approval of the study protocol must also be provided in the manuscript.
